# Supplementary material for: Double-blind, Randomized, Placebo-Controlled study to evaluate the Efficacy of an early treatment with Herbal Supplement based in the Prevention of Post-Traumatic Stress Disorder in emergency department (PHYTéS Study)
Source: bioRxiv or medRxiv preprint supplement (doi:10.1101/2022.01.12.22268879), 2022-01-13
Supplement: Supplementary file [file media-1.pdf]

| <b>Table3 : CAPS-5 Items</b> |         |         |            |                  |
|------------------------------|---------|---------|------------|------------------|
|                              | Groups  | Moyenne | Ecart-type | P                |
| B10days                      | PLACEBO | 18.8    | 5.1        | 0.991            |
|                              | ALEOZEN | 18.8    | 5          |                  |
| C10days                      | PLACEBO | 7.5     | 2.1        | 0.847            |
|                              | ALEOZEN | 7.4     | 2.2        |                  |
| D10days                      | PLACEBO | 25.2    | 7.4        | 0.745            |
|                              | ALEOZEN | 24.8    | 7.8        |                  |
| E10days                      | PLACEBO | 19      | 7.3        | 0.276            |
|                              | ALEOZEN | 17.8    | 6.9        |                  |
| B30 days                     | PLACEBO | 13.6    | 5.3        | 0.784            |
|                              | ALEOZEN | 13.3    | 5.6        |                  |
| C30 days                     | PLACEBO | 5.3     | 2.3        | 0.999            |
|                              | ALEOZEN | 5.3     | 2.5        |                  |
| D30 days                     | PLACEBO | 17.7    | 7.5        | 0.951            |
|                              | ALEOZEN | 17.7    | 8.4        |                  |
| E30 days                     | PLACEBO | 14      | 5.8        | 0.913            |
|                              | ALEOZEN | 13.9    | 6.2        |                  |
| B90 days                     | PLACEBO | 13.6    | 6.8        | <b>&lt;0.001</b> |
|                              | ALEOZEN | 9.8     | 5.9        |                  |
| C90 days                     | PLACEBO | 6.5     | 3.7        | <b>0.001</b>     |
|                              | ALEOZEN | 4.7     | 3.1        |                  |
| D90 days                     | PLACEBO | 17.5    | 8.8        | <b>&lt;0.001</b> |
|                              | ALEOZEN | 13.1    | 7.1        |                  |
| E90 days                     | PLACEBO | 16.8    | 7.2        | <b>&lt;0.001</b> |
|                              | ALEOZEN | 12.9    | 7.3        |                  |
| B one year                   | PLACEBO | 12.6    | 6.1        | <b>0.001</b>     |
|                              | ALEOZEN | 9.1     | 5.1        |                  |
| C one year                   | PLACEBO | 5.6     | 3.7        | <b>0.041</b>     |
|                              | ALEOZEN | 2.4     | 2.1        |                  |
| D one year                   | PLACEBO | 13.8    | 2.9        | <b>0.028</b>     |
|                              | ALEOZEN | 10.7    | 7.6        |                  |
| E one year                   | PLACEBO | 12.9    | 8.1        | <b>0.021</b>     |
|                              | ALEOZEN | 10.2    | 6.1        |                  |

| <b>Table 4 : CAPS-5 Items variations</b> |         |         |            |              |
|------------------------------------------|---------|---------|------------|--------------|
|                                          | Group   | Moyenne | Ecart-type | P            |
| BB 30 days                               | PLACEBO | 5.2     | 5.6        | 0.853        |
|                                          | ALEOZEN | 5.4     | 5.5        |              |
| BB 90 days                               | PLACEBO | 5.6     | 8.8        | <b>0.006</b> |
|                                          | ALEOZEN | 9.1     | 6.9        |              |
| BB one year                              | PLACEBO | 6.1     | 4.6        | <b>0.018</b> |
|                                          | ALEOZEN | 9.2     | 4.5        |              |
| CC 30 days                               | PLACEBO | 2.1     | 2.2        | 0.768        |
|                                          | ALEOZEN | 2.1     | 2.5        |              |
| CC 90 days                               | PLACEBO | 1.1     | 4.2        | <b>0.007</b> |
|                                          | ALEOZEN | 2.7     | 3.5        |              |
| CC one year                              | PLACEBO | 1.9     | 2.6        | <b>0.038</b> |
|                                          | ALEOZEN | 2.6     | 3.1        |              |
| DD30 days                                | PLACEBO | 7.5     | 7.8        | 0.693        |
|                                          | ALEOZEN | 7.1     | 8.2        |              |
| DD 90 days                               | PLACEBO | 8.1     | 11.7       | <b>0.027</b> |
|                                          | ALEOZEN | 11.7    | 9.3        |              |
| DD one year                              | PLACEBO | 8.8     | 9.1        | <b>0.044</b> |
|                                          | ALEOZEN | 10.6    | 8.2        |              |
| EE 30 days                               | PLACEBO | 5.2     | 6.8        | 0.185        |
|                                          | ALEOZEN | 3.9     | 6.3        |              |
| EE 90 days                               | PLACEBO | 2.8     | 9.8        | 0.136        |
|                                          | ALEOZEN | 5       | 9.4        |              |
| EE one year                              | PLACEBO | 2.2     | 6.6        | <b>0.047</b> |
|                                          | ALEOZEN | 4.2     | 5.1        |              |
